# 1 **Designing a multi-epitope peptide-based vaccine against SARS-CoV-2**

2 **Abhishek Singh<sup>1,2</sup>, Mukesh Thakur<sup>1\*</sup>, Lalit Kumar Sharma<sup>1</sup> and Kailash Chandra<sup>1</sup>**

3 <sup>1</sup>Zoological Survey of India, New Alipore, Kolkata- 700053, India

4 <sup>2</sup>Gujarat Forensic Sciences University, Sector 9, Gandhinagar, Gujarat 382007, India

## 5 **\* Corresponding authors:**

6 Dr. Mukesh Thakur

7 Scientist C - Centre for DNA Taxonomy &

8 Coordinator - Centre for Forensic Sciences

9 Zoological Survey of India, New Alipore

10 Kolkata-700053, West Bengal, India

11 Mobile: +91-8171051282; FAX : 91-33-24008595

12 E. mail: [thamukesh@gmail.com](mailto:thamukesh@gmail.com)

13

## 14 **Abstract**

15 COVID-19 pandemic has resulted so far 14,395,16 confirmed cases with 85,711 deaths from the  
16 212 countries, or territories. Due to multifacet issues and challenges in implementation of the  
17 safety & preventive measures, inconsistent coordination between societies-governments and  
18 most importantly lack of specific vaccine to SARS-CoV-2, the spread of Wuhan originated virus  
19 is still uprising after taking a heavy toll on human life. In the present study, we mapped several  
20 immunogenic epitopes (B-cell, T-cell, and IFN-gamma) over the entire structural proteins of  
21 SARS-CoV-2 and by applying various computational and immunoinformatics approaches, we  
22 designed a multi-epitope peptide based vaccine that predicted high immunogenic response in the  
23 largest proportion of world's human population. To ensure high expression of the recombinant  
24 vaccine in *E. coli*, codon optimization and in-silico cloning were also carried out. The designed  
25 vaccine with high molecular affinity to TLR3 and TLR4, was found capable to initiate effective  
26 innate and adaptive immune response. The immune simulation also suggested uprising high  
27 levels of both B-cell and T-cell mediated immunity which on subsequent exposure cleared  
28 antigen from the system. The proposed vaccine found promising by yielding desired results and  
29 hence, should be tested by practical experimentations for its functioning and efficacy to  
30 neutralize SARS-CoV-2.

31 **Keywords:** SARS-CoV-2; structural proteins; multi-epitope vaccine; immunoinformatics;  
32 computational modelling

### 33 **Introduction**

34 Coronavirus disease 2019 (COVID-19) is one of the most potent pandemics characterized by  
35 respiratory infections in Human. As per the latest report of World Health Organization (WHO)  
36 dated 10<sup>th</sup> of April 2020, the worldwide coverage of COVID-19 exceeded 14,395,16 confirmed  
37 cases with mortality of 85,711 deaths from 212 countries, areas or territories [1]. The outbreak of  
38 COVID-19 emerged at Wuhan city of Hubei Province of P.R. China in the early December of  
39 2019 [2], but the report of severe pneumonic patients with unknown etiology of symptoms was  
40 released by the Chinese Center for Disease Control on December 31<sup>st</sup>, 2019 [3]. Later on, the  
41 novel Betacoronavirus (SARS-CoV-2) was confirmed as the causative agent for the clusters of  
42 pneumonic cases by the health professionals. Investigations on the origin of infections linked the  
43 SARS-CoV-2 virus to a seafood market in Wuhan city, China which got spread to a large extent  
44 of human population in China in a very short period of time. By the time, scientists/ health  
45 professionals paid a serious note to understand the mode of transmission of COVID-19, it had  
46 reached and infected several people in different countries with an insight into the escalated  
47 transmission rate. This led the WHO to declare COVID-19 as a Public Health Emergency of  
48 International Concern (PHEIC) on 30<sup>th</sup> of January 2020 [4].

49 Until the outbreak of Severe Acute Respiratory Syndrome (SARS) in 2002 and 2003,  
50 coronaviruses were considered as a mild pathogenic virus causing respiratory and intestinal  
51 infections in animals and humans [5-9]. With a decade long pandemic of SARS, another potent  
52 pathogenic coronavirus, i.e., Middle East Respiratory Syndrome Coronavirus (MERS-CoV)  
53 appeared specifically in the Middle Eastern countries [10]. Extensive studies on these two  
54 coronaviruses have led to an understanding that they are genetically diverse but likely to be  
55 originated from bats [11, 12]. Apart from these two viruses, four other coronaviruses are  
56 commonly detected in Humans, viz., HKU1, 229E, OC43 and NL63 [13, 14]. Among all the  
57 coronaviruses reported so far, SARS-CoV, MERS-CoV, and SARS-CoV-2 have relatively high  
58 pathogenicity and escalated mortality rates. SARS CoV alone was responsible for 8422 positive  
59 cases and 919 probable fatalities over a vast population of 32 countries [15]. With the first  
60 mortality case reported in 2012, 2496 cases were found positive for MERS-CoV and 868 deaths

61 were reported from 27 countries [15]. Both of these pandemics were considered as highly  
62 pathogenic in the last two decades until the outbreak of SARS-CoV-2 in December 2019. SARS-  
63 CoV-2 has already spread in 212 countries and caused 85,522 deaths in just last three and half  
64 months [1]. As in the current scenario, several countries are facing the most fatal problem of  
65 community spread of SARS-CoV-2 e.g. China, Italy, Spain, France, Iran, USA, India, Germany  
66 etc. Though, the estimated mortality rate due to SARS-CoV-2 is about 3.6% in China and about  
67 1.5% outside China [16], the problem is grave and need to be respond urgently to curb the rapid  
68 loss of human life.

69 Coronaviruses are broadly divided into four genera, i.e., Alpha-CoV, Beta-CoV, Gamma-CoV  
70 and Delta-CoV, where Alpha-CoV and Beta-CoV are only reported to infect mammals but  
71 Gamma-CoV and Delta-CoV are also capable to infect both mammals and birds [17]. Extensive  
72 study of their biology suggests that they are non-segmented enveloped viruses with a positive-  
73 sense single-stranded RNA of a size range of 26-32 kb [18]. Some of the recent research  
74 suggested that SARS-CoV-2 has an identical genomic characterization as of Beta-CoV and thus  
75 the genomic structure of SARS-CoV-2 follows 5'-leader-UTR-replicase-S (Spike)-E  
76 (Envelope)-M(Membrane)-N (Nucleocapsid)-3' UTRpoly (A) tail with the subsequent species-  
77 specific accessory gene at 3' terminal of the viral genome [19]. The structural protein includes  
78 Spike/Surface protein (S), Envelop protein (E), Membrane protein (M) and Nucleocapsid protein  
79 (N). These Spike/Surface proteins are known to have crucial roles in survival and viral  
80 pathogenesis as the receptor binding capability and entry to the host cell is regulated by the  
81 influence of Surface protein [20]. The Envelop and Membrane proteins are responsible for viral  
82 assembly and Nucleocapsid protein is necessary for RNA genome synthesis [20]. This complex  
83 genetic makeup and moderate mutation rate of SARS-CoV-2 requires the strategic development  
84 of vaccine by targeting all the structural proteins. Unfortunately, there is no approved vaccine  
85 available as on date against SARS-CoV-2. However, a few studies have predicted peptide-based  
86 vaccine targets for specific glycoproteins [21, 22] but no study has covered all the structural  
87 proteins for vaccine designing. With the recent development of integrated bioinformatics and  
88 immunoinformatics approaches, vaccine designing and its specific application has become rapid  
89 and cost effective as with the computational simulations and predictions, the targeted  
90 immunogenic peptide can be designed and validated for its efficacy to work on human, even  
91 before having the vaccine in hand for practical exposure and experiments. However,

92 conventional methods have simultaneously proven effective in vaccine designing with some  
93 limitation, e.g. sacrificing the whole organism or large protein residues which unnecessarily  
94 increases the antigenic load and probability of allergenicity [23]. We believe that an ideal multi-  
95 epitope vaccine candidate can enhance immune response and subsequently lower down the risk  
96 of re-infection by upraising the host immunogenicity. In this perspective, here we applied  
97 integrated approaches of vaccine designing by mapping B-cell, T-cell and IFN-gamma epitopes  
98 (humoral and adaptive immune response) of humans on the respective structural proteins based  
99 on several essential criteria.

## 100 **Methodology**

101 Retrieval of SARS-CoV-2 protein sequences and antigenicity prediction

102 All the protein sequences of SARS-CoV-2 available on NCBI ( GenBank: MN908947.3) was  
103 retrieved and structural protein sequences were extracted for further analysis. We predicted  
104 antigenicity from each protein using the online server VaxiJen v2.0 [24] and proteins that  
105 showed antigenicity  $\geq 0.4$  in the virus category were subjected for further analysis.

## 106 **Prediction of physiochemical and secondary structural properties of the target proteins**

107 The physicochemical properties of target proteins were examined using ExPasy Protpram online  
108 server [25] and the conformational states, e.g. Helix, sheet, turn and coil were predicted using the  
109 online Secondary Structure Analysis Tool (SOPMA) [26] with default parameters.

## 110 **3 Dimensional homology modeling and validation**

111 Three-dimensional structure of target proteins was modeled using three homology modeling  
112 tools,i.e. I Tasser, Raptor-X and Phyre2 [27-29] and post processing to reduce any distortions in  
113 the modeled structure was done using the Galaxy refine server [30].The modeled structures were  
114 subjected to RAMPAGE server for Ramachandran plot analysis for quality check and  
115 validation[31 and visualized using Chimera 1.10.1 visualization system [32].

## 116 **Prediction of T-cell epitopes**

### 117 **Cytotoxic T-cell (CTL) epitopes**

118 Nine residues long CTL epitopes recognized by HLA class-I supertypes, i.e., A1, A2, A3, A24,  
119 A26, B7, B8, B27, B39, B44, B58, B62 were predicted using NetCTL.1.2 server [33]  
120 considering the default values of weight on C terminal cleavage, weight on TAP transport  
121 efficiency and threshold for epitope identification. Further, another set of CTL epitopes  
122 recognized by HLA class I alleles like A\*02:02, B\*07:02, C\*04:01, E\*01:01, etc were identified

123 by consensus method of Immune Epitope Database (IEDB) tool [34]. The identified epitopes  
124 were scrutinized based on the consensus score i.e.  $\leq 2$  and only those epitopes were considered as  
125 strong binders and selected for further analysis which were predicted by more than one allele of  
126 both the method used.

### 127 **Helper T-cell (HTL) epitopes**

128 Fifteen residue long HTL epitopes recognized by HLA Class II DRB1 alleles were predicted  
129 using Net MHC II pan 3.2 server [35]. The thresholds for strong binder and weak binder were set  
130 as default. Further another set of HTL epitopes of 15 residues length recognized by HLA DR  
131 alleles were identified using the consensus method as implemented in the IEDB server [34] The  
132 epitopes with a percentile rank of  $\leq 2$  and predicted by more than one allele of both the methods  
133 were considered as a strong binder and scrutinized for further analysis.

### 134 **Identification of overlapping T-cell epitopes**

135 Considering the fact that epitopes with affinity for multiple HLA alleles tend to induce relatively  
136 more immune response in the host cell, we scrutinized overlapping epitopes with affinity to both  
137 HLA class I and class II alleles for immunogenicity and allergen prediction using VaxiJen v2.0  
138 server [24] and AllerTop v.2.0 [36] tool with an immunogenic threshold of 0.4. These epitopes  
139 would have high potential to activate both CTL and HTL cells.

### 140 **Identification of Continuous and Discontinuous B-cell epitopes**

141 B-cell epitopes are short amino acid sequences recognized by the surface-bound receptors of B-  
142 lymphocyte. Their identification plays a major role in vaccine designing, and thus two types-  
143 Continuous and Discontinuous B- cell epitopes were predicted over the corresponding structural  
144 protein sequences. The continuous B-cell epitopes, present on the surface of proteins, were  
145 predicted using BCpred 2.0 [37] server and the discontinuous epitopes which were fairly large  
146 were predicted using Ellipro server [38]. The prediction parameters like Minimum score and  
147 Maximum distance (Anstrom) were set as 0.8 and 6, respectively.

### 148 **Identification of IFN- gamma epitopes**

149 Since, IFN gamma is the signature cytokine of both the innate and adaptive immune system and  
150 epitopes with potency to induce IFN gamma could boost the immunogenic capacity of any  
151 vaccine. Thus, IFN gamma epitopes were predicted for each structural protein by the IFNepitope  
152 server [39].

### 153 **Characterization of predicted epitopes**

## 154 **Conservation analysis**

155 Predicted T-cell and B-cell epitopes were submitted to the IEDB conservancy analysis tool [40]  
156 to identify the degree of conservancy in the structural protein sequences and the epitopes with  
157 100% conservancy were selected for further analysis.

## 158 **Population coverage and autoimmunity identification**

159 Immunogenetic response of human population towards the selected overlapping CTL and HTL  
160 epitopes against their respective HLA genotype frequencies was predicted using IEDB  
161 population coverage analysis tool [41]. Those epitopes exhibiting 50% or more population  
162 coverage were scrutinized and to reduce the probability of autoimmunity, all the selected  
163 epitopes were subjected to BlastP search analysis against the Human proteome. Epitopes  
164 showing similarity to any human protein were excluded from the further analysis.

## 165 **Interaction analysis of epitopes and their HLA alleles**

166 The sequence of scrutinized epitopes was submitted to an online server PEPFOLD 3 [42] for 3D  
167 structure modeling. The structure of the most common HLA alleles i.e. HLA-DRB1 \*01:01  
168 (HLA class II) and HLA-A\* 02:01 (HLA class I) in human population were retrieved from  
169 Protein data bank (PDB) with a PDB ID of 2g9h and 1QEW. Any ligand associated with the  
170 HLA allele's structure was removed and energy-minimization was carried out. Thereafter, the  
171 modeled epitopes were docked with the corresponding HLA allele using a web server Patchdock  
172 [43], to study the interaction pattern of receptor and ligand. The parameters like clustering  
173 RMSD value and the complex type was kept as 0.4 and default. The result obtained from  
174 Patchdock was forwarded to the Firedock server [44] for the refinement of the best 10 models.  
175 Based on Global energy value, the complex with the lowest global energy was scrutinized and  
176 the corresponding CTL and HTL epitopes were selected for the final vaccine construct.

## 177 **Construction and quality control of final multi-epitope vaccine**

178 For the construction of a multi-epitope vaccine against SARS-CoV-2, we followed Chauhan et  
179 al. [23] with some modifications. The epitopes were finally selected based on meeting the  
180 following criteria: 1). epitopes must be immunogenic, non-allergic and overlapping with affinity  
181 to both HLA class I and class II alleles; 2).epitopes must be capable to activate both CTL and  
182 HTL cells and must have a minimum 50% of the population coverage; 3).epitopes should not be  
183 overlapping with any human gene and the predicted B-Cell epitopes should overlap with  
184 finalized CTL and HTL epitopes and should be present on the surface of the target protein.

185 Based on these criteria, the HTL, CTL and IFN gamma epitopes were included in the final  
186 construct of the multi-epitope vaccine. The HTL and IFN gamma epitopes were linked by  
187 GPGPG linkers, whereas the CTL epitopes were linked by AAY linkers [23]. An adjuvant, 50S  
188 ribosomal protein L7/L12 (Locus RL7\_MYCTU) with an NCBI accession no: P9WHE3 was  
189 added to the N terminal to enhance the immunogenicity of the constructed vaccine.

#### 190 **Antigenicity, allergenicity and physiochemical properties of vaccine**

191 The antigenicity of the proposed vaccine was predicted using VaxiJen v2.0 server [24] and  
192 allergenicity was predicted using Allertop v.2.0 prediction tool [36]. The physicochemical  
193 property of the designed vaccine was predicted by submitting the final sequence of the vaccine to  
194 the Exspasy Protpram online server [25].

#### 195 **Prediction of secondary structure**

196 The secondary structure of the constructed vaccine was predicted using the SOPMA tool [26].  
197 With the input of vaccine sequence and output width 70, the parameters like the number of  
198 conformational states, similarity threshold, and window width were set as 4 (Helix, Sheet, Turn,  
199 Coil), 8 and 17.

#### 200 **Modeling, refinement, and validation of vaccine construct**

201 The final model of the constructed vaccine was prepared using a homology modeling tool  
202 SPARKS-X [45]. Among the top 10 predicted models, the model with the highest Z-score was  
203 selected and subjected for refinement using the Galaxy refine server [30]. Among all the  
204 refinement tools, Galaxy refine is one of the most efficient server according to CASP10  
205 evaluation. Then after, we utilized ProSA-webtool [46] to assess the overall and local quality of  
206 the predicted model based on the Z-score. If the Z-score lies outside the range of native protein  
207 of similar size, a chance of error increases in the predicted structure. Further to check the overall  
208 quality of the refined structure of vaccine, Ramachandran plot analysis was carried out using the  
209 RAMPAGE server [31]. The final model of the vaccine construct was visualized using Chimera  
210 1.10.1 visulaization system [32].

#### 211 **Prediction of Continuous and Discontinuous epitopes**

212 Continuous and Discontinuous B- cell epitopes in the vaccine construct were predicted using  
213 BCpred 2.0 [37] and IEDB server [34], respectively. For effective designing of vaccine, the  
214 constructed vaccine should posses' B-cell epitopes for potential enhancement of immunogenic  
215 reactions.

## 216 **Molecular docking of constructed vaccine with TLR3 and TLR4 receptor**

217 The 3D structures of human TLR3 and TLR4 were retrieved from protein data bank (PDB ID:  
218 2A0Z and 2z63). Any ligand attached to the retrieved structures was removed and the receptor  
219 was subjected for model refinement using Galaxy refine server [30]. Molecular docking analysis  
220 was performed using the Cluspro v.2 protein-protein docking server [47] to analyze the  
221 interaction pattern of vaccine with TLR3 and TLR4. The server provides cluster scores based on  
222 rigid docking by sampling billions of conformation, pairwise RMSD energy minimization. Based  
223 on the lowest energy weight score and members, the final vaccine-TLR3 complex and TLR4  
224 complex model was selected and visualized using Chimera 1.10.1 visualization system [32].

## 225 ***In silico* cloning and vaccine optimization**

226 Efficiency of the multi-epitope vaccine construct in cloning and expression is of the utmost  
227 importance for vaccine designing. The final multi-epitope vaccine construct was submitted to the  
228 Java Codon Adaptation Tool (JCat) [48], where codon optimization was performed in *E. coli*  
229 strain K12. In addition to this, the parameters like Avoid rho-independent transcription  
230 terminators, Avoid prokaryotic ribosome binding sites, Avoid Cleavage Sites of Restriction  
231 Enzymes were selected for the final submission. The output of the JCat tool provided CAI value  
232 and GC content of the optimized sequence. Ideally, the CAI value should be greater than 0.8 or  
233 nearer to 1 [49], and the GC content should be in a range of 30 to 70% [50] to ensure that the  
234 vaccine has potential translation, stability and transcription efficiency. Further, an *in silico*  
235 cloning of a multi-epitope vaccine construct in *E. coli* pET- 28(+) vector was performed using  
236 the SnapGene 4.2 tool [51].

## 237 **Immune simulations of vaccine construct**

238 To characterize the real-life immunogenic profiles and immune response of the multi-epitope  
239 vaccine, C-ImmSim server [52] was utilized. Position-specific scoring matrix (PSSM) and  
240 machine learning are the two methods, based on which C-ImmSim predicts immune epitopes and  
241 immune interactions. It simultaneously simulates three different anatomical regions of mammals,  
242 i.e. Bone marrow, Thymus and tertiary lymphatic organs. To conduct the immune simulation,  
243 three injections at an interval of four weeks were administered with 1000 vaccine molecules per  
244 injection. The parameters like Random seed, simulation volume, and simulation step were kept  
245 as 12345, 10 $\mu$ l and 1050. Several studies suggested that the minimum interval between two  
246 injections should be kept four weeks and thus the time steps followed for three injections were 1,



247 84 and 168 where each time step is equal to 8 hours of real-life [53]. Since, several patients  
248 worldwide got recurrent infection of SARS-CoV-2, 12 consecutive injections were administered  
249 four weeks apart for the assessment of after effects of vaccine exposure on SARS-CoV-2.

## 250 **Results**

### 251 **Target proteins and their antigenicity**

252 We scrutinized target structural protein sequences, i.e. Surface, Membrane, Envelop and  
253 Nucleocapsid proteins from the whole-genome of SARS-CoV-2, 29903 bp ss- RNA (GenBank:  
254 MN908947.3). Antigenicity prediction from the structural protein sequences revealed that  
255 Envelop proteins has the highest antigenicity score 0.6025, followed by Membrane,  
256 Nucleocapsid and Surface protein (table 1).

### 257 **Physiochemical and secondary structural properties**

258 Theoretical estimates of isoelectric point (PI) suggested that all the structural proteins were basic  
259 in nature and their predicted instability indices were below 40 indicating their stable nature  
260 except the Nucleocapsid protein with an instability index of 55.09 (table S1). The predicted  
261 secondary structure characteristics of all the structural proteins showed variable percentage of  
262 Alpha Helix, Extended Strand, Beta Turn and Random Coil (table S2).

### 263 **3 Dimensional structure of target proteins**

264 The refined finalized 3D structures obtained from Raptor-X was better than the models generated  
265 from I Tasser and Phyre2 as Raptor-X models showed least percentage of outliers and therefore  
266 selected for further analysis (figure 1). Details of various models of the structural proteins  
267 through Ramachandran plot analysis are given in table S3.

### 268 **Prediction of CTL and HTL epitopes**

269 A total of 29 CTL epitopes in Envelop protein, 77 in Nucleocapsid, 340 in Surface and 89  
270 epitopes in Membrane protein were predicted with strong binding affinity for multiple alleles.  
271 Similarly, 35 HTL epitopes in Envelop protein, 51 in Nucleocapsid, 252 in surface and 23  
272 epitopes in Membrane protein were predicted. All these epitopes were strong binders and  
273 predicted percentile rank of  $\leq 2$ .

### 274 **Identification of overlapping T cell epitopes**

275 The CTL epitopes overlapping with HTL epitopes were scrutinized and subjected to  
276 immunogenicity and allergenicity prediction. In total, 16 CTL overlapped epitopes were  
277 predicted in Envelop protein, 8 in Nucleocapsid protein, 25 in Surface protein and 9 epitopes in  
278 Membrane protein (Table S4-S11). All these selected epitopes were predicted to be non-allergic  
279 with high antigenic scores.

### 280 **Identification of B-cell epitopes**

281 The identified continuous B cell epitopes present on the surface of their respective proteins were  
282 selected based on their antigenic, non-allergic and overlapping nature in the finalized CTL and  
283 HTL epitopes. With these criteria, five epitopes were obtained in Surface protein, three in  
284 Nucleocapsid and one in Membrane protein (table S12). No epitope with such criteria was  
285 identified in Envelop protein. Further, one discontinuous epitope in Envelop protein, seven in  
286 Nucleocapsid, nine in Surface and four discontinuous epitopes were predicted in Membrane  
287 protein (table S13).

### 288 **Identification of IFN- gamma epitopes**

289 The server IFNepitope predicted eight epitopes in Envelop protein, 39 in Membrane, 66 in  
290 Nucleocapsid and 281 in Surface protein. Based on antigenicity and non-allergenicity, eight  
291 epitopes were scrutinized in Envelop protein, 13 in Membrane, 43 in Nucleocapsid and 81 in  
292 Surface protein. To obtain the highest immunogenicity and reduce the overload of epitopes in  
293 vaccine construct, we selected one epitope from each protein with the highest antigenicity score  
294 and non-allergenicity (table S14).

### 295 **Characterization of predicted epitopes**

#### 296 **Conservation analysis, Population coverage, and autoimmunity identification**

297 The conservation prediction resulted that all the selected T cell and B cell epitopes were 100%  
298 conserved among the target structural proteins and population coverage prediction showed that  
299 five epitopes in Envelop protein, two in Membrane, two in Nucleocapsid and six epitopes in  
300 Surface protein covered more than 50% of worldwide population. No selected epitope with  
301 >50% population coverage showed homology with any human protein. Thus, altogether 30  
302 epitopes, 15 each of CTL and HTL, met the above criteria were processed for the interaction  
303 analysis with the commonly occurring HLA alleles in the Human population (table S15).

#### 304 **Interaction analysis of epitopes and their HLA alleles**

305 Molecular interaction analysis of each selected CTL and HTL epitopes with their respective  
306 HLA alleles resulted in 10 predicted docked complex. Each complex showed different Global  
307 energy value. Out of the characterized 30 epitopes, the epitopes with highest negative value of  
308 Global energy (set threshold -40) were considered as effectively interacting epitopes with the  
309 corresponding HLA allele, and thus selected for final vaccine construct (table 2). This resulted in  
310 two CTL and HTL epitopes in Envelop protein, one in Membrane, two in Nucleocapsid and two  
311 in Surface protein. For an ideal vaccine, the epitopes included should have potential affinity  
312 towards their respective alleles and thus greater the interaction between epitopes and their alleles,  
313 more is the affinity.

### 314 **Construction of final multi-epitope vaccine**

315 We selected seven CTL, seven HTL and four IFN gamma epitopes for construction of the multi-  
316 epitope vaccine (figure S1). The adjuvant was coupled by EAAAK linker with CTL epitope and  
317 subsequently, AAY linker was used to couple CTL epitopes and GPGPG linker was used to  
318 couple HTL and IFN gamma epitopes (figure 2). The final multi-epitope vaccine construct was  
319 composed of 430 amino acid residues which was then validated for antigenic, allergenic and  
320 physiochemical properties.

### 321 **Evaluation of antigenicity, allergenicity, physiochemical properties and secondary 322 structure of the vaccine construct**

323 The multi-epitope vaccine construct found to be immunogenic (Ag score- 0.627), non-allergic  
324 with 45.131 KDa predicted molecular weight. The prediction suggested that vaccine construct  
325 was stable and basic in nature with instability index 23.46 and theoretical PI 9.01. The half-life  
326 of the vaccine in mammalian reticulocytes (in vitro) was 30 hrs, while it was about 20 hrs in  
327 yeast (in-vivo) and 10 hrs in *E. coli* (in vivo).

328 The predicted secondary structure of the vaccine constructed consisted 42.33% alpha-helix,  
329 22.09% extended strand, 4.42% beta-turn and 31.16% random coil.

### 330 **Modeling, refinement, and validation of vaccine construct**

331 Of the top 10 predicted models, the model with the Z-score of 7.61 with template 1dd3A was  
332 selected for refinement. The ProSA-web tool assessed the overall and local quality of the refined  
333 model with a Z-score of -0.47 which was close to the range of native protein of similar size  
334 (figure 3). Further, the Ramachandran plot analysis revealed 92% of residues in the favored

335 region, 6.1% in the allowed region and 1.9% outliers. This signified that the quality of the  
336 predicted vaccine construct was adequate for further analysis.

### 337 **Prediction of Continuous and Discontinuous epitopes**

338 BCpred 2.0 server predicted four continuous epitopes i.e. AKILKEKYGLD,  
339 EILDKSKEKTSFD, LKESKDLV and VPKHLKKGLSKEEAESLKKQLEEV on the surface of  
340 predicted vaccine (figure S2), while IEDB predicted six discontinuous epitopes (figure S3) with  
341 a score higher than 0.8 (Table S16).

### 342 **Molecular docking of constructed vaccine with TLR3 and TLR4 receptor**

343 Cluspro v.2 predicted 30 models each of vaccine receptor TLR3 complex and TLR4 complex  
344 with their corresponding cluster scores (Table S17-S18). Among these models, the model  
345 number 2 in TLR3 complex and model number 1 in TLR4 complex were selected as a best-  
346 docked complex with the lowest energy score of -1199.1 with 46 members (TLR3) and lowest  
347 energy score of -1229.9 with 79 members (TLR4). This signifies potential molecular interaction  
348 between predicted vaccine construct with TLR3 and TLR 4 receptors (figure 4).

### 349 ***In silico* cloning and vaccine optimization**

350 The Java Codon Adaptation Tool optimized the codon usage of the vaccine and produced an  
351 optimized codon sequence of length 1290 nucleotides. The CAI value of optimized sequences  
352 was 0.95, close to 1 and the GC content was found to be 54.41 %, fall between the range of 30 to  
353 70%. Therefore, the adaptation was satisfactory indicating potential expression of vaccine  
354 construct in host *E.coli*. Later on, the restriction sequence of Xho I and Not I restriction enzymes  
355 were added to N and C terminal of adapted codon sequence. Further, the adapted sequence was  
356 also cloned in pET- 28(+) vector using SnapGene tool (figure 5).

### 357 **Immune simulations of vaccine construct**

358 C-ImmSim server-generated immune response was consistent with the actual immune response  
359 as depicted by the results (figure 6 and S4). The primary response was generated as marked by  
360 the increase in the level of IgM. Similarly, the secondary response was characterized by an  
361 increased level of IgM+IgG, IgG1+IgG2, IgG1, IgG2, and B-cell populations. On the subsequent  
362 exposure of vaccine, a decrease in the level of antigens was observed indicating the development  
363 of immunogenic response in the form of immune memory. Both the T cell populations i.e. CTL

364 and HTL developed increased response corresponding to the memory cells signifying the  
365 immunogenicity of T cell epitopes included in the vaccine construct. Increased activity of  
366 macrophages was also observed at each exposure, whereas the activity of NK cells was observed  
367 consistent throughout the period. A significant increase in the level of IFN gamma, IL-10, IL-23,  
368 and IL-12 was also observed at subsequent exposure (figure 6). After the repeated exposure of  
369 vaccine construct through 12 injections after a regular interval, a remarkable increase in the  
370 level of IgM+IgG, IgG1+IgG2. Though, IgG1 increased slightly but IgM and IgG2 increased  
371 consistently. A surge in the memory corresponding to B cell and T cells was observed  
372 throughout the exposure while the level of IFN gamma was consistently high from first to last  
373 exposure (figure S4). This signifies that the vaccine proposed in this study has generated a strong  
374 immune response in case of short exposure and immunity increases even on subsequent repeated  
375 exposure.

## 376 **Discussion**

377 The recent outbreak of SARS-CoV-2 in Wuhan city of China raised several questions regarding  
378 the susceptibility of Humans against these novel pathogens. As predicted earlier about the re-  
379 emergence of novel variants of SARS-CoV [54], SARS-CoV-2 proved to be more lethal as  
380 compared to the previous variants in terms of wide spread of virus in a short period of time. This  
381 escalated rate of transmission initiated a pursuit for a vaccine development against SARS-CoV-  
382 2, which is currently a worldwide pandemic with over 1.43 million cases and 85,711 deaths [1].  
383 With strict and comprehensive measures, vaccine development and its application could play a  
384 key role in eliminating the virus from the Human population or to restrain the spread among  
385 individuals and different populations. Thus several efforts are being made to address the  
386 challenge that appeared in the current scenario with appreciable advancements in the  
387 understanding of virus biology and its etiology. The lack of knowledge regarding the response of  
388 the immune system against viral infection is one of the major limitations in the path of vaccine  
389 development for SARS-CoV-2.

390 This study is the piolt attempt in describing the potential immunogenic target over the structural  
391 proteins and proposes a novel multi-epitope vaccine construct, by providing new rays of hope in  
392 the initial phase of vaccine development. Certain criteria like poor antigenicity, allergenicity, low  
393 affinity towards the immune cells, autoimmunity and oversize that could influence the

394 effectiveness, have been evaluated on the proposed vaccine construct following various  
395 computational and immunoinformatics approach. The retrieved structural proteins and their  
396 antigenicity score suggested that the Envelop protein is the most potent protein to generate  
397 immune response considering its role in viral assembly. Since, immunity against any pathogen is  
398 prominently dependent, how it gets recognized by B cells and T cells. We identified epitopes  
399 corresponding to B cells and T cells in each structural protein so that both humoral and cellular  
400 immunity can be induced with the exposure of vaccine construct. The proposed vaccine construct  
401 is designed based on the epitopes that have been selected with the most robust criteria, e.g. their  
402 nature of antigenic, non-allergic, 100% conserved among the target proteins, their affinity for  
403 multiple alleles, no homology with any of the human proteins, their worldwide coverage of  
404 human population (>50% of worldwide population covered) and effective molecular interaction  
405 with their respective HLA alleles. Further, IFN gamma epitopes which are equally effective in  
406 immune regulatory, antiviral and antitumor activities, the final vaccine construct was designed  
407 with also due considering of the IFN gamma epitopes to increase the immune recognition ability.  
408 The designed vaccine of 430 amino acid residues has a molecular weight of 45.131K Da, also  
409 falls in the defined range of average molecular weight of a multi-epitope vaccine. The instability  
410 index and theoretical PI also suggested that the vaccine is stable and basic in nature and the  
411 estimated half-life suggested that the recognized peptide does not possess a short half-life and  
412 would remain viable for a span adequate to generate a potential immune response. Vaccine  
413 model refinement and validation indicated that quality of the predicted model was good as more  
414 than 90% residues were in the favored region [55]. The B-cell continuous epitopes predicted  
415 over the surface of the vaccine suggested that the vaccine is capable to get recognized by B-cells  
416 indicating its effectiveness. TLR 3 and TLR 4 have proven recognition capability in both SARS-  
417 CoV and MERSCoV. Considering the similar genome characterization of SARS-CoV and  
418 SARS- CoV-2, the molecular interaction of vaccine with TLR 3 and TLR 4 through docking  
419 analysis suggested that the constructed vaccine has a significant affinity towards the toll-like  
420 receptors to act as sensor for recognizing molecular patterns of pathogen and initiating immune  
421 response. Thus the vaccine TLR complex is capable of generating an effective innate immune  
422 response against SARS-CoV-2. Further, Codon adaptation improved the expression of the  
423 recombinant vaccine in *E coli*. Strain K12 with significant codon adaptation index and GC  
424 content indicating elevated expression level. After successful cloning of the recombinant vaccine

425 in the pET- 28(+) vector, the simulation based generated immune response suggested that the  
426 primary and secondary immune response will be coherent with the actual expected response.  
427 Subsequent exposure for three injections indicated the potential capability of vaccine for  
428 generating memory cells and a higher probability of significant immune response on later  
429 exposure to coronavirus. The consistent high level of IFN gamma also supported the activation  
430 of humoral immunity. To understand the immunogenic potential of vaccine, repeated exposure in  
431 the form of 12 injections was administered and the result suggested the consistent generation of a  
432 strong immune response. With all these immunoinformatics approaches, the vaccine designed  
433 against SARS-CoV-2 showed promising results in inducing immune response.

434 Without proper control methods or vaccines, it is difficult to curb coronavirus pandemic given  
435 the current situation. However, several medications have been tested against SARS-CoV-2, but  
436 none of them showed complete effectiveness. In this study, a vaccinomics approach was carried  
437 out to design a multi-epitope vaccine against SARS-CoV-2 using several in silico and  
438 immunoinformatic approaches. Based on the computational and immunoinformatics approaches,  
439 we propose that the designed vaccine has all the potential to induce both the innate and adaptive  
440 immune systems and can neutralize the SARS-CoV-2, and therefore, an experimental validation  
441 of the designed vaccine must be undertaken by the professional for reaching a conclusion for its  
442 safety, efficacy and success.

#### 443 **Acknowledgements**

444 We thank Zoological Survey of India, Kolkata for providing access to the computational support,  
445 working space and facilities to undertake the present study.

#### 446 **References**

- 447 1. World Coronavirus disease 2019 (COVID-19) Situation Report – 77, 9<sup>th</sup> April 2020.
- 448 2. Zhang, Y.Z., Holmes, E.C. A Genomic Perspective on the Origin and Emergence of  
449 SARS-CoV-2. *Cell*. 2020.
- 450 3. World-Health-Organization Coronavirus disease (COVID-19) outbreak. Available  
451 online: <https://www.who.int/emergencies/diseases/novel-coronavirus-2019> (accessed on  
452 3rd April 2020).

- 453 4. World-Health-Organization Statement on the second meeting of the International Health  
454 Regulations(2005) Emergency Committee regarding the outbreak of novel coronavirus  
455 (2019-nCoV). Available online: [https://www.who.int/news-room/detail/30-01-2020-](https://www.who.int/news-room/detail/30-01-2020-statement-on-the-second-meeting-of-the-international-health-regulations-(2005-emergency-committee-regarding-the-outbreak-of-novel-coronavirus-(2019-ncov)))  
456 [statement-on-the-second-meeting-of-the-international-health-regulations-\(2005\)](https://www.who.int/news-room/detail/30-01-2020-statement-on-the-second-meeting-of-the-international-health-regulations-(2005-emergency-committee-regarding-the-outbreak-of-novel-coronavirus-(2019-ncov)))  
457 [emergency-committee-regarding-the-outbreak-of-novelcoronavirus-\(2019-ncov\)](https://www.who.int/news-room/detail/30-01-2020-statement-on-the-second-meeting-of-the-international-health-regulations-(2005-emergency-committee-regarding-the-outbreak-of-novel-coronavirus-(2019-ncov)))  
458 (accessed on 29 March 2020).
- 459 5. Masters, P. S., Perlman, S. In *Fields Virology Vol. 2* (eds Knipe, D. M. &Howley, P. M.)  
460 825–858 (Lippincott Williams & Wilkins, 2013).
- 461 6. Zhong, N. S. et al. Epidemiology and cause of severe acute respiratory syndrome (SARS)  
462 in Guangdong, People’s Republic of China, in February, 2003. *Lancet*. **362**, 1353–1358  
463 (2003).
- 464 7. Drosten, C. et al. Identification of a novel coronavirus in patients with severe acute  
465 respiratory syndrome. *N. Engl. J. Med.* **348**, 1967–1976 (2003).
- 466 8. Fouchier, R. A. et al. Aetiology: Koch’s postulates fulfilled for SARS virus. *Nature*. **423**,  
467 240 (2003).
- 468 9. Ksiazek, T. G. et al. A novel coronavirus associated with severe acute respiratory  
469 syndrome. *N. Engl. J. Med.* **348**, 1953–1966 (2003).
- 470 10. Zaki, A. M., van Boheemen, S., Bestebroer, T. M., Osterhaus, A. D. Fouchier, R. A.  
471 Isolation of a novel coronavirus from a man with pneumonia in Saudi Arabia. *N. Engl. J.*  
472 *Med.* **367**, 1814–1820 (2012).
- 473 11. Lau, S. K. et al. Severe acute respiratory syndrome coronavirus-like virus in Chinese  
474 horseshoe bats. *Proc. Natl Acad. Sci.* **102**, 14040–14045 (2005).
- 475 12. Ithete, N. L. et al. Close relative of human Middle East respiratory syndrome coronavirus  
476 in bat, South Africa. *Emerg. Infect. Dis.* **19**, 1697–1699 (2013).
- 477 13. Su, S. et al. Epidemiology, genetic recombination, and pathogenesis of  
478 coronaviruses. *Trends Microbiol.* **24**, 490–502 (2016).
- 479 14. Forni, D., Cagliani, R., Clerici, M., Sironi, M. Molecular evolution of human coronavirus  
480 genomes. *Trends Microbiol.* **25**, 35–48 (2017).
- 481 15. Meo, S A., et al. Novel Coronavirus 2019-nCoV: Prevalence, Biological and Clinical  
482 Characteristics Comparison With SARS-CoV and MERS-CoV. *European Review for*  
483 *Medical and Pharmacological Sciences.* **24**, 4, pp. 2012-2019 (2020).



- 484 16. Baud, D. et al. Real estimates of mortality following COVID-19 infection, *The Lancet*  
485 *Infectious diseases*. (2020).
- 486 17. Woo, P. C. et al. Discovery of seven novel mammalian and avian coronaviruses in the  
487 genus deltacoronavirus supports bat coronaviruses as the gene source of alphacoronavirus  
488 and betacoronavirus and avian coronaviruses as the gene source of gammacoronavirus  
489 and deltacoronavirus. *J. Virol.* **86**, 3995–4008 (2012).
- 490 18. Su, S. et al. Epidemiology, genetic recombination, and pathogenesis of coronaviruses.  
491 *Trends Microbiol.* **24**, 490-502 (2016).
- 492 19. Zhu, N. et al. A novel coronavirus from patients with pneumonia in China, 2019. *New*  
493 *England Journal of Medicine*. (2020).
- 494 20. Schoeman, D., Fielding, B.C. Coronavirus envelope protein: current knowledge. *Virol*  
495 *J.* **16**, 69 (2019).
- 496 21. Abdelmageed, M.I. et al. Design of multi epitope-based peptide vaccine against E protein  
497 of human 2019-nCoV: An immunoinformatics approach. *bioRxiv*. (2020).
- 498 22. Bojin, F., Gavriiliuc, O., Margineanu, M., Paunescu, V. Design of an Epitope-Based  
499 Synthetic Long Peptide Vaccine to Counteract the Novel China Coronavirus (2019-  
500 nCoV). *Preprints*. (2020).
- 501 23. Chauhan, V. et al. Designing a multi-epitope based vaccine to combat Kaposi Sarcoma  
502 utilizing immunoinformatics approach. *Sci Rep.* **9**, 2517 (2019).
- 503 24. Doytchinova, I. A., Flower, D. R. VaxiJen: a server for prediction of protective antigens,  
504 tumour antigens and subunit vaccines. *BMC Bioinformatics.* **8**, 4 (2007).
- 505 25. Wilkins, M. R. et al. Protein identification and analysis tools in the ExPASy  
506 server. *Methods Mol. Biol.* **112**, 531–552 (1999).
- 507 26. Geourjon, C., Deleage, G. SOPMA: significant improvements in protein secondary  
508 structure prediction by consensus prediction from multiple  
509 alignments. *Bioinformatics.* **11**, 681–684 (1995).
- 510 27. Yang, J. et al. The I-TASSER Suite: protein structure and function prediction. *Nature*  
511 *methods.* **12**, 7 (2015).
- 512 28. Källberg, M. et al. Template-based protein structure modeling using the RaptorX web  
513 server. *Nature protocols.* **7**, 1511 (2012).

- 514 29. Kelley, L. A., Mezulis, S., Yates, C. M., Wass, M. N., Sternberg, M. J. The Phyre2 web  
515 portal for protein modeling, prediction and analysis. *Nature protocols*. **10**, 845 (2015).
- 516 30. Heo, L., Park, H., Seok, C. GalaxyRefine: Protein structure refinement driven by side-  
517 chain repacking. *Nucleic acids research*. **41**, 384-388 (2013).
- 518 31. Lovell, S. C. et al. Structure validation by C $\alpha$  geometry:  $\phi$ ,  $\psi$  and C $\beta$  deviation. *Proteins:*  
519 *Structure, Function, and Bioinformatics*. **50**, 437–450 (2003).
- 520 32. Pettersen, E. F. et al. UCSF Chimera- a visualization system for exploratory research and  
521 analysis. *Journal of Computational Chemistry*. **13**, 1605–1612 (2004).
- 522 33. Larsen, M. V. et al. Large-scale validation of methods for cytotoxic T-lymphocyte  
523 epitope prediction. *BMC bioinformatics*. **8**, 424 (2007).
- 524 34. Kim, Y. et al. Immune epitope database analysis resource. *Nucleic acids research*. **40**,  
525 525–530 (2012).
- 526 35. Jensen, K. K. et al. Improved methods for predicting peptide binding affinity to MHC  
527 class II molecules. *Immunology*. **154(3)**, 394-406 (2018).
- 528 36. Bangov, I., Doytchinova, I., Dimitrov, I., Flower, D. AllerTOP v.2 - A server for in silico  
529 prediction of allergens. *J. Mol. Model*. **20**, 2278-2284 (2014)..
- 530 37. Manzalawy, Y.EL., Dobbs, D., Honavar, V. Predicting linear B- cell epitopes using  
531 string kernels. *Journal of Molecular Recognition: An Interdisciplinary Journal*. **21**, 243–  
532 255 (2008).
- 533 38. Ponomarenko, J. et al. ElliPro: a new structure-based tool for the prediction of antibody  
534 epitopes. *BMC bioinformatics*. **9**, 514 (2008).
- 535 39. Dhanda, S. K., Vir, P., Raghava, G. P. Designing of interferon-gamma inducing MHC  
536 class-II binders. *Biology direct*. **8**, 30 (2013).
- 537 40. Bui, H. H., Sidney, J., Li, W., Fusseder, N., Sette, A. Development of an epitope  
538 conservancy analysis tool to facilitate the design of epitope-based diagnostics and  
539 vaccines. *BMC bioinformatics*. **8**, 361 (2007).
- 540 41. Bui, H. H. et al. Predicting population coverage of T-cell epitope-based diagnostics and  
541 vaccines. *BMC bioinformatics*. **7**, 153 (2006).
- 542 42. Lamiable, A. et al. PEP-FOLD3: faster de novo structure prediction for linear peptides in  
543 solution and in complex. *Nucleic acids research*. **44**, 449–454 (2016).

- 544 43. Schneidman, D., Inbar, Y., Nussinov, R., Wolfson, H. PatchDock and SymmDock:  
545 Servers for Rigid and Symmetric Docking. *Nucleic acids research*. **33**. 363-7 (2005).
- 546 44. Mashiach, E., Schneidman, D., Andrusier, N., Nussinov, R., Wolfson, Haim. FireDock:  
547 A Web Server for Fast Interaction Refinement in Molecular Docking. *Nucleic acids*  
548 *research*. **36**. 229-32 (2008).
- 549 45. Y. Yang., E. Faraggi., H. Zhao., Y. Zhou. Improving protein fold recognition and  
550 template-based modeling by employing probabilistic-based matching between predicted  
551 one-dimensional structural properties of query and corresponding native properties of  
552 templates. *Bioinformatics*. **27(15)**, 2076–2082 (2011).
- 553 46. Wiederstein, M., Sippl, M. J. ProSA-web: interactive web service for the recognition of  
554 errors in three-dimensional structures of proteins. *Nucleic acids research*. **35**, 407–410  
555 (2007).
- 556 47. Kozakov, D. The ClusPro web server for protein-protein docking. *Nat. Protoc.* **12**, 255–  
557 278 (2017).
- 558 48. Grote, A. et al. JCat: a novel tool to adapt codon usage of a target gene to its potential  
559 expression host. *Nucleic Acids Research*. **33**, 526–531 (2005).
- 560 49. Morla, S., Makhija, A., Kumar, S. Synonymous codon usage pattern in glycoprotein gene  
561 of rabies virus. *Gene*. **584**, 1–6 (2016).
- 562 50. Ali, M. et al. Exploring dengue genome to construct a multi-epitope based subunit  
563 vaccine by utilizing immunoinformatics approach to battle against dengue infection. *Sci*  
564 *Rep.* **7**, 9232 (2017).
- 565 51. SnapGene software (from Insightful Science; available at [snapgene.com](http://snapgene.com)).
- 566 52. Rapin, N., Lund, O., Bernaschi, M., Castiglione, F. Computational immunology meets  
567 bioinformatics: the use of prediction tools for molecular binding in the simulation of the  
568 immune system. *PLoS One*. **5**, e9862 (2010).
- 569 53. Castiglione, F., Mantile, F., De Berardinis, P., Prisco, A. How the interval between prime  
570 and boost injection affects the immune response in a computational model of the immune  
571 system. *Comput. Math. Methods Med.* 1–9 (2012).
- 572 54. Cui, J., Li, F., Shi, Z. Origin and evolution of pathogenic coronaviruses. *Nat Rev*  
573 *Microbiol.* **17**, 181–192 (2019).

574 55. Wlodawer, A. Stereochemistry and validation of macromolecular structures. *Methods*  
575 *Mol. Biol.* **1607**, 595–610 (2017).

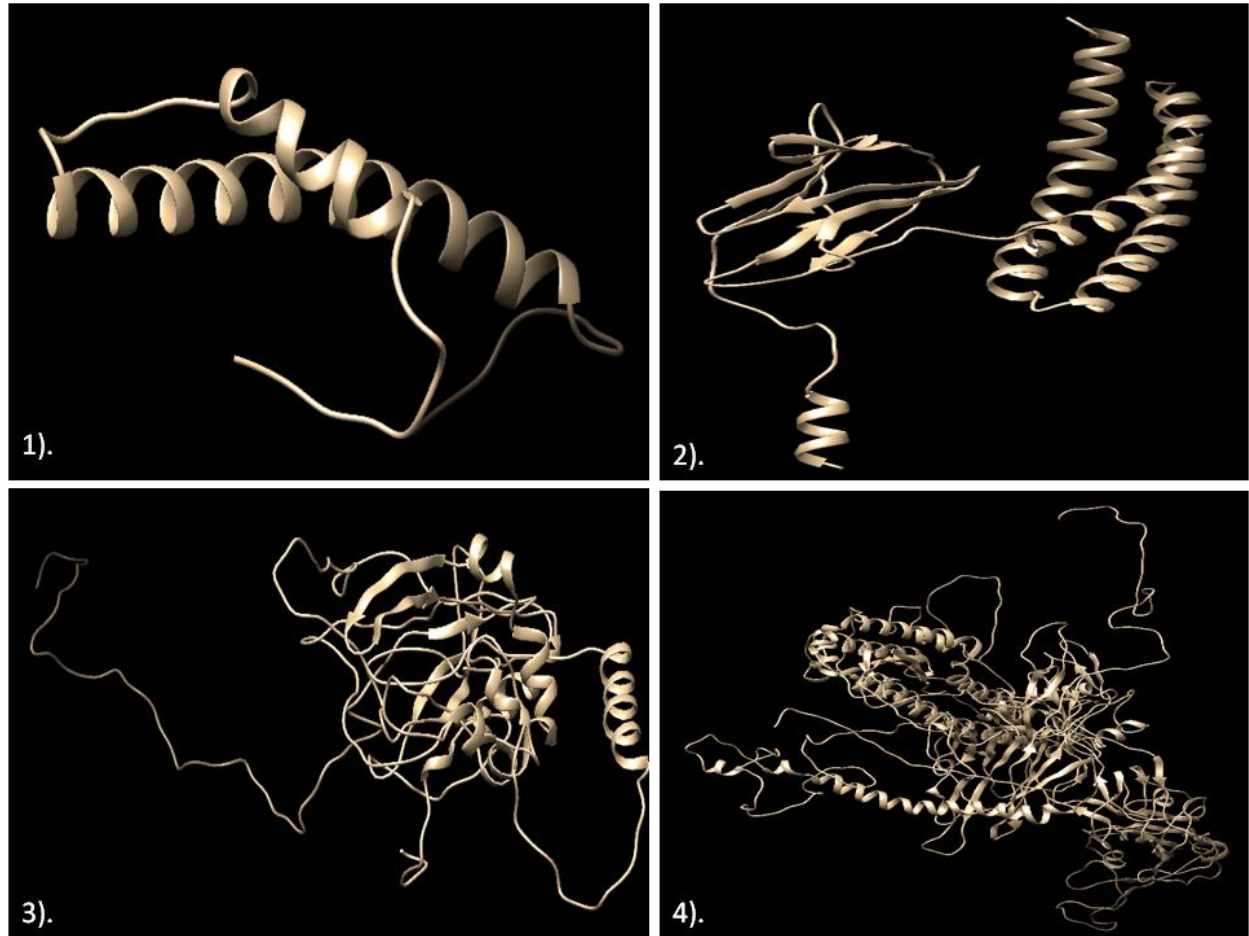

Figure 1). The 3D models of structural proteins of SARS- CoV-2.1). Envelop protein; 2). Membrane protein; 3). Nucleocapsid protein; 4). Surface protein

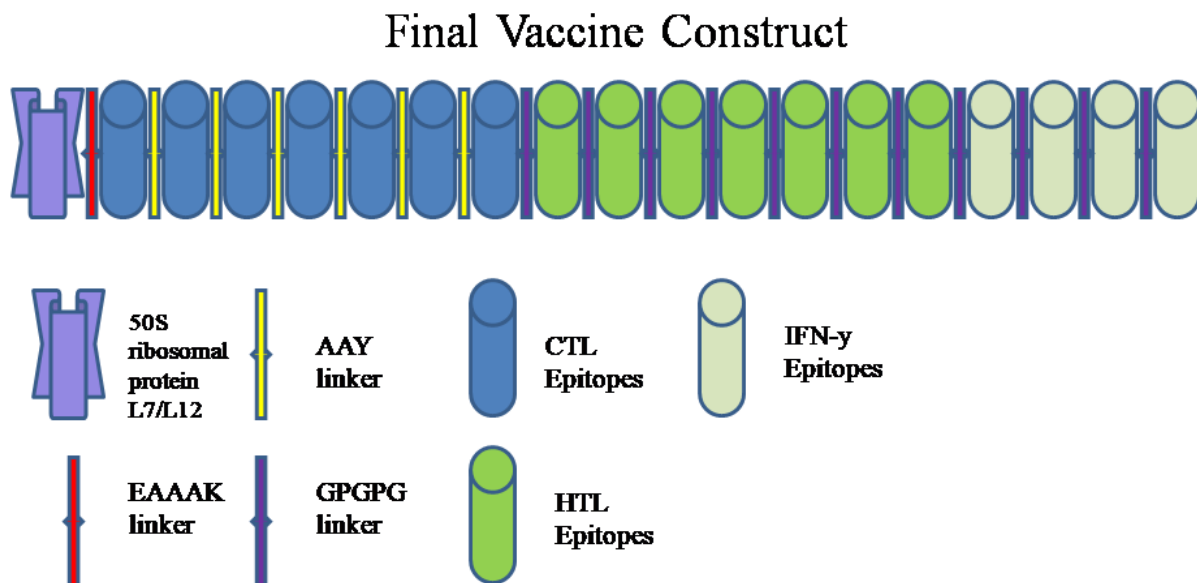

Figure 2. Schematic diagram of final vaccine construct

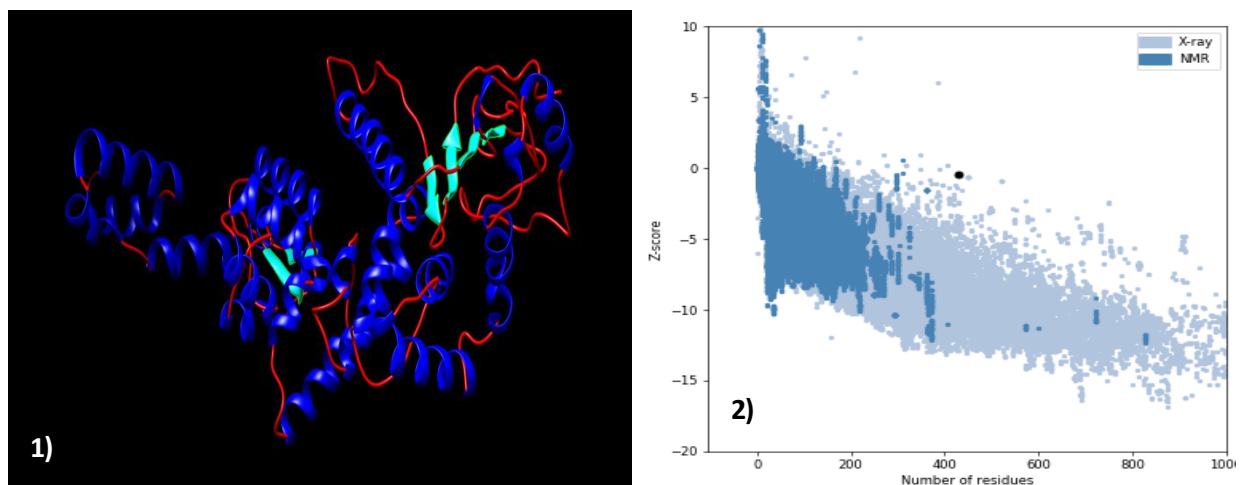

Figure 3. 1). 3 dimensional structure of final vaccine construct, 2). ProSA validation of predicted structure with Z score of -0.47.

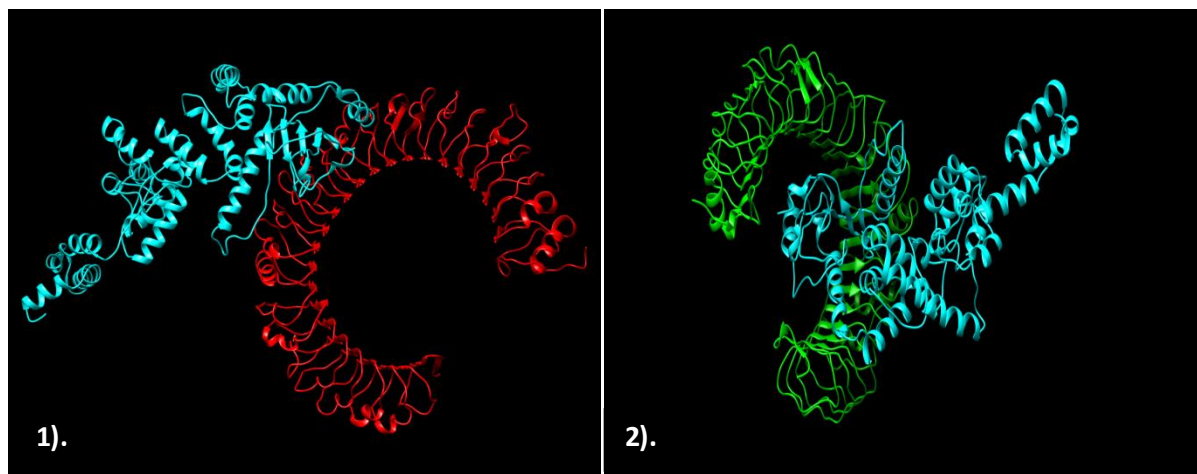

Figure 4. The interaction pattern of designed vaccine with TLR3 and TLR4. 1). Vaccine (Cyan) docked with receptor TLR3 (Red). 2). Vaccine (Cyan) docked with receptor TLR4 (Green).

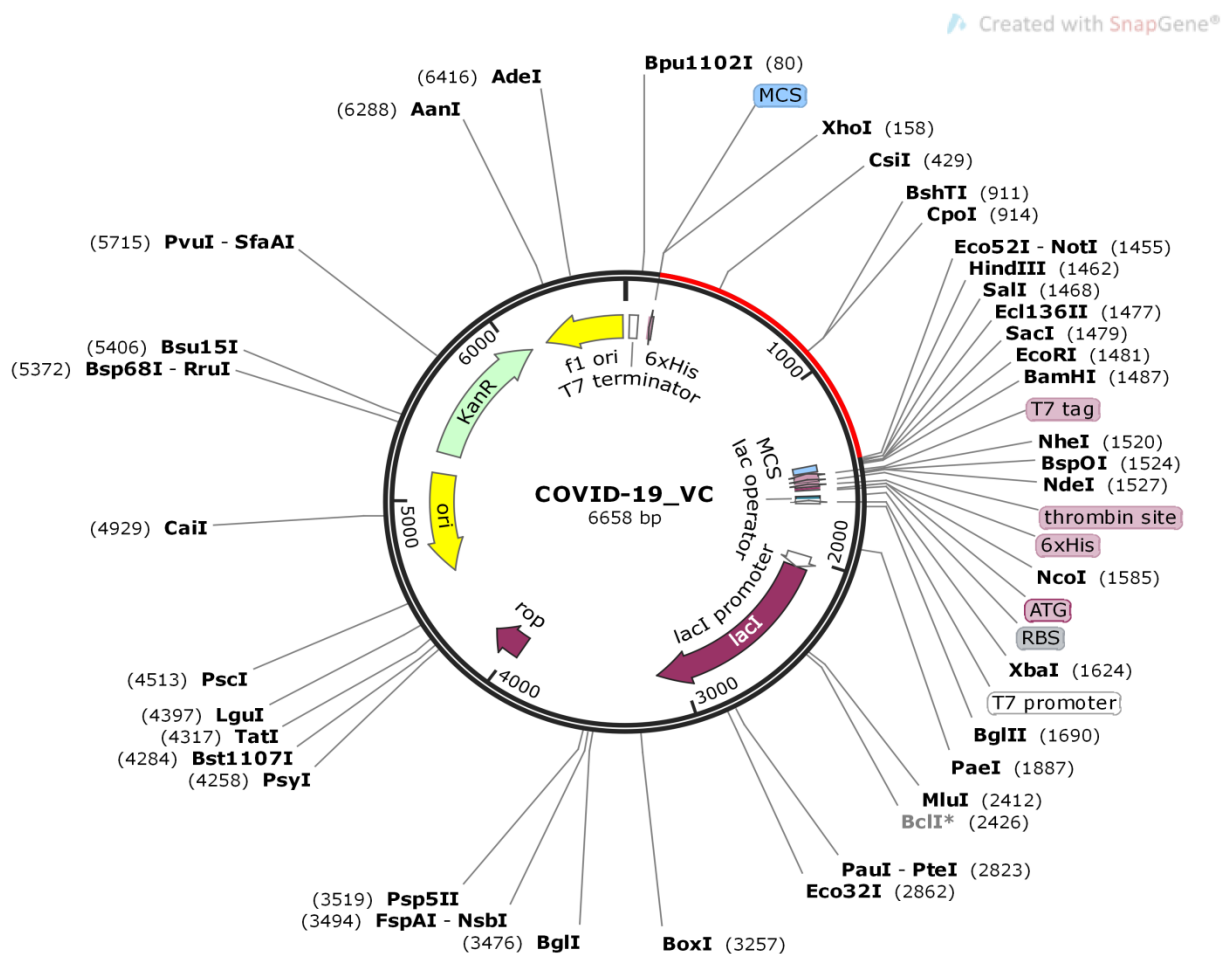

Figure 5. In silico cloning of vaccine. The segment represented in red is the multi-epitope vaccine insert in pET- 28(+) expression vector.

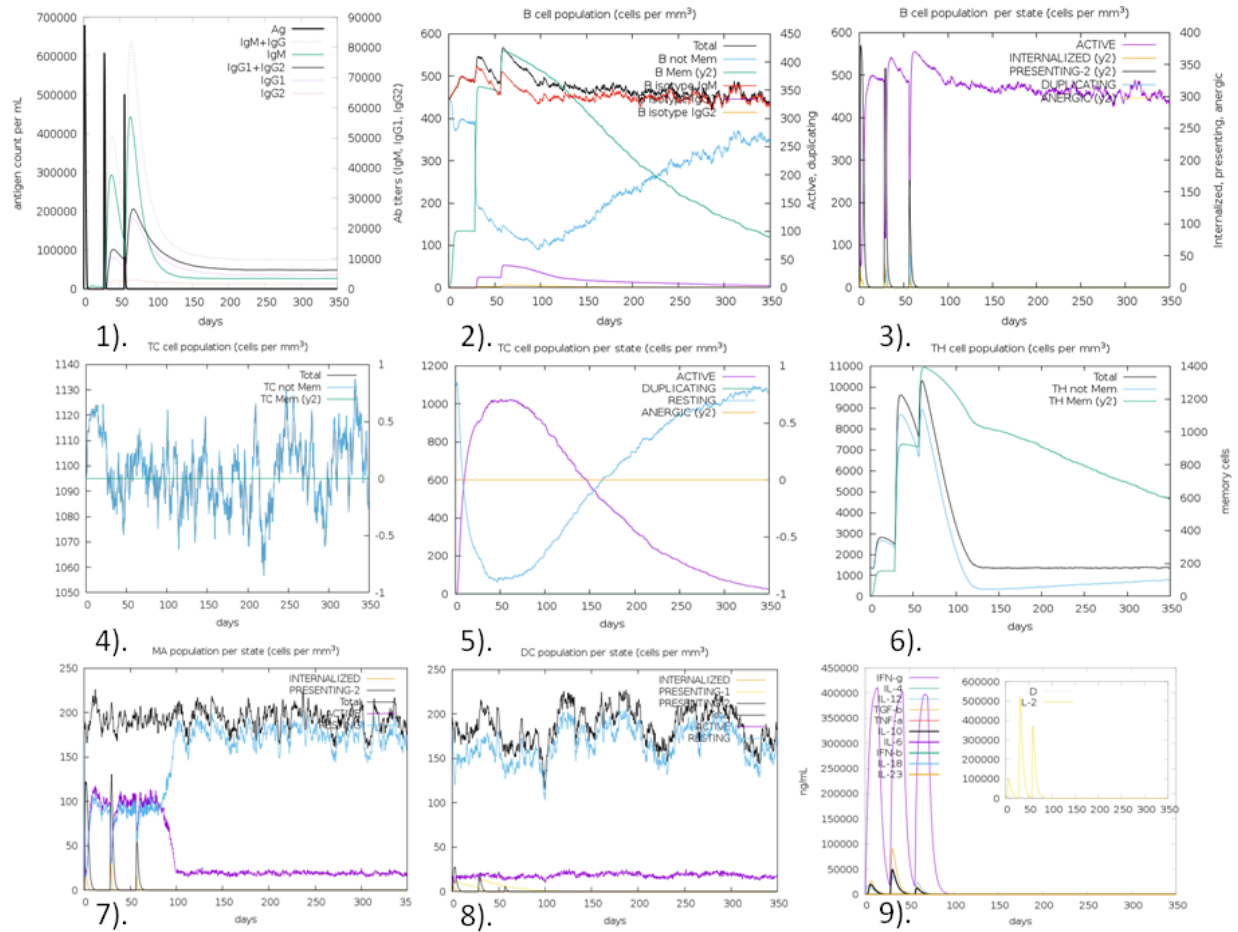

Figure. 6. In silico simulation of immune response using vaccine as an antigen after subsequent three injections. 1). Antigen and Immunoglobulins. 2). B-cell population. 3). B-cell population per state. 4). Cytotoxic T-cell population. 5). Cytotoxic T-cell population per state. 6). Helper T-cell population. 7). Macrophages population per state. 8). Dendritic cell population per state. 9). Cytokine production.



Table 1. Details of target protein and their antigenicity score

| <b>Structural Protein</b> | <b>Protein ID (NCBI)</b> | <b>Size (aa)</b> | <b>Antigenicity score</b> |
|---------------------------|--------------------------|------------------|---------------------------|
| Surface protein           | QHD43416.1               | 1273             | 0.4646                    |
| Membrane protein          | QHD43419.1               | 222              | 0.5102                    |
| Envelop protein           | QHD43418.1               | 75               | 0.6025                    |
| Nucleocapsid protein      | QHD43423.2               | 419              | 0.5059                    |

Table 2. Final epitopes selected for multi-epitope vaccine construct after docking analysis with respective HLA alleles

| <b>S.No</b> | <b>Protein</b> | <b>HTL</b>       | <b>Global_Energy</b> | <b>CTL</b> | <b>Global_Energy</b> |
|-------------|----------------|------------------|----------------------|------------|----------------------|
| 1           | Envelop        | LLFLAFVVFLVTLA   | -71.44               | LLFLAFVVF  | -41.45               |
| 2           | Envelop        | LAFVVFLVTLAILT   | -64.39               | FLLVTLAIL  | -43.31               |
| 3           | Membrane       | TLACFVLAAYRINW   | -53.12               | TLACFVLAA  | -54.85               |
| 4           | Nucleocapsid   | GDAALALLLDRLNQ   | -87.95               | GDAALALLL  | -40.49               |
| 5           | Nucleocapsid   | AQFAPSASAFFGMSR  | -58.74               | AQFAPSASA  | -43.29               |
| 6           | Surface        | IPFAMQMA YRFNGIG | -46.33               | FAMQMAYRF  | -41.37               |
| 7           | Surface        | FVFLVLLPLVSSQCV  | -74.92               | FVFLVLLPL  | -55.15               |
